# Supplementary figures and images for: Structural characterization of off-stoichiometric kesterite-type Cu2ZnGeSe4 compound semiconductors: from cation distribution to intrinsic point defect density
Source: Royal Society of Chemistry journal article supplement (doi:10.1039/c7ce02090b), 2018-01-01

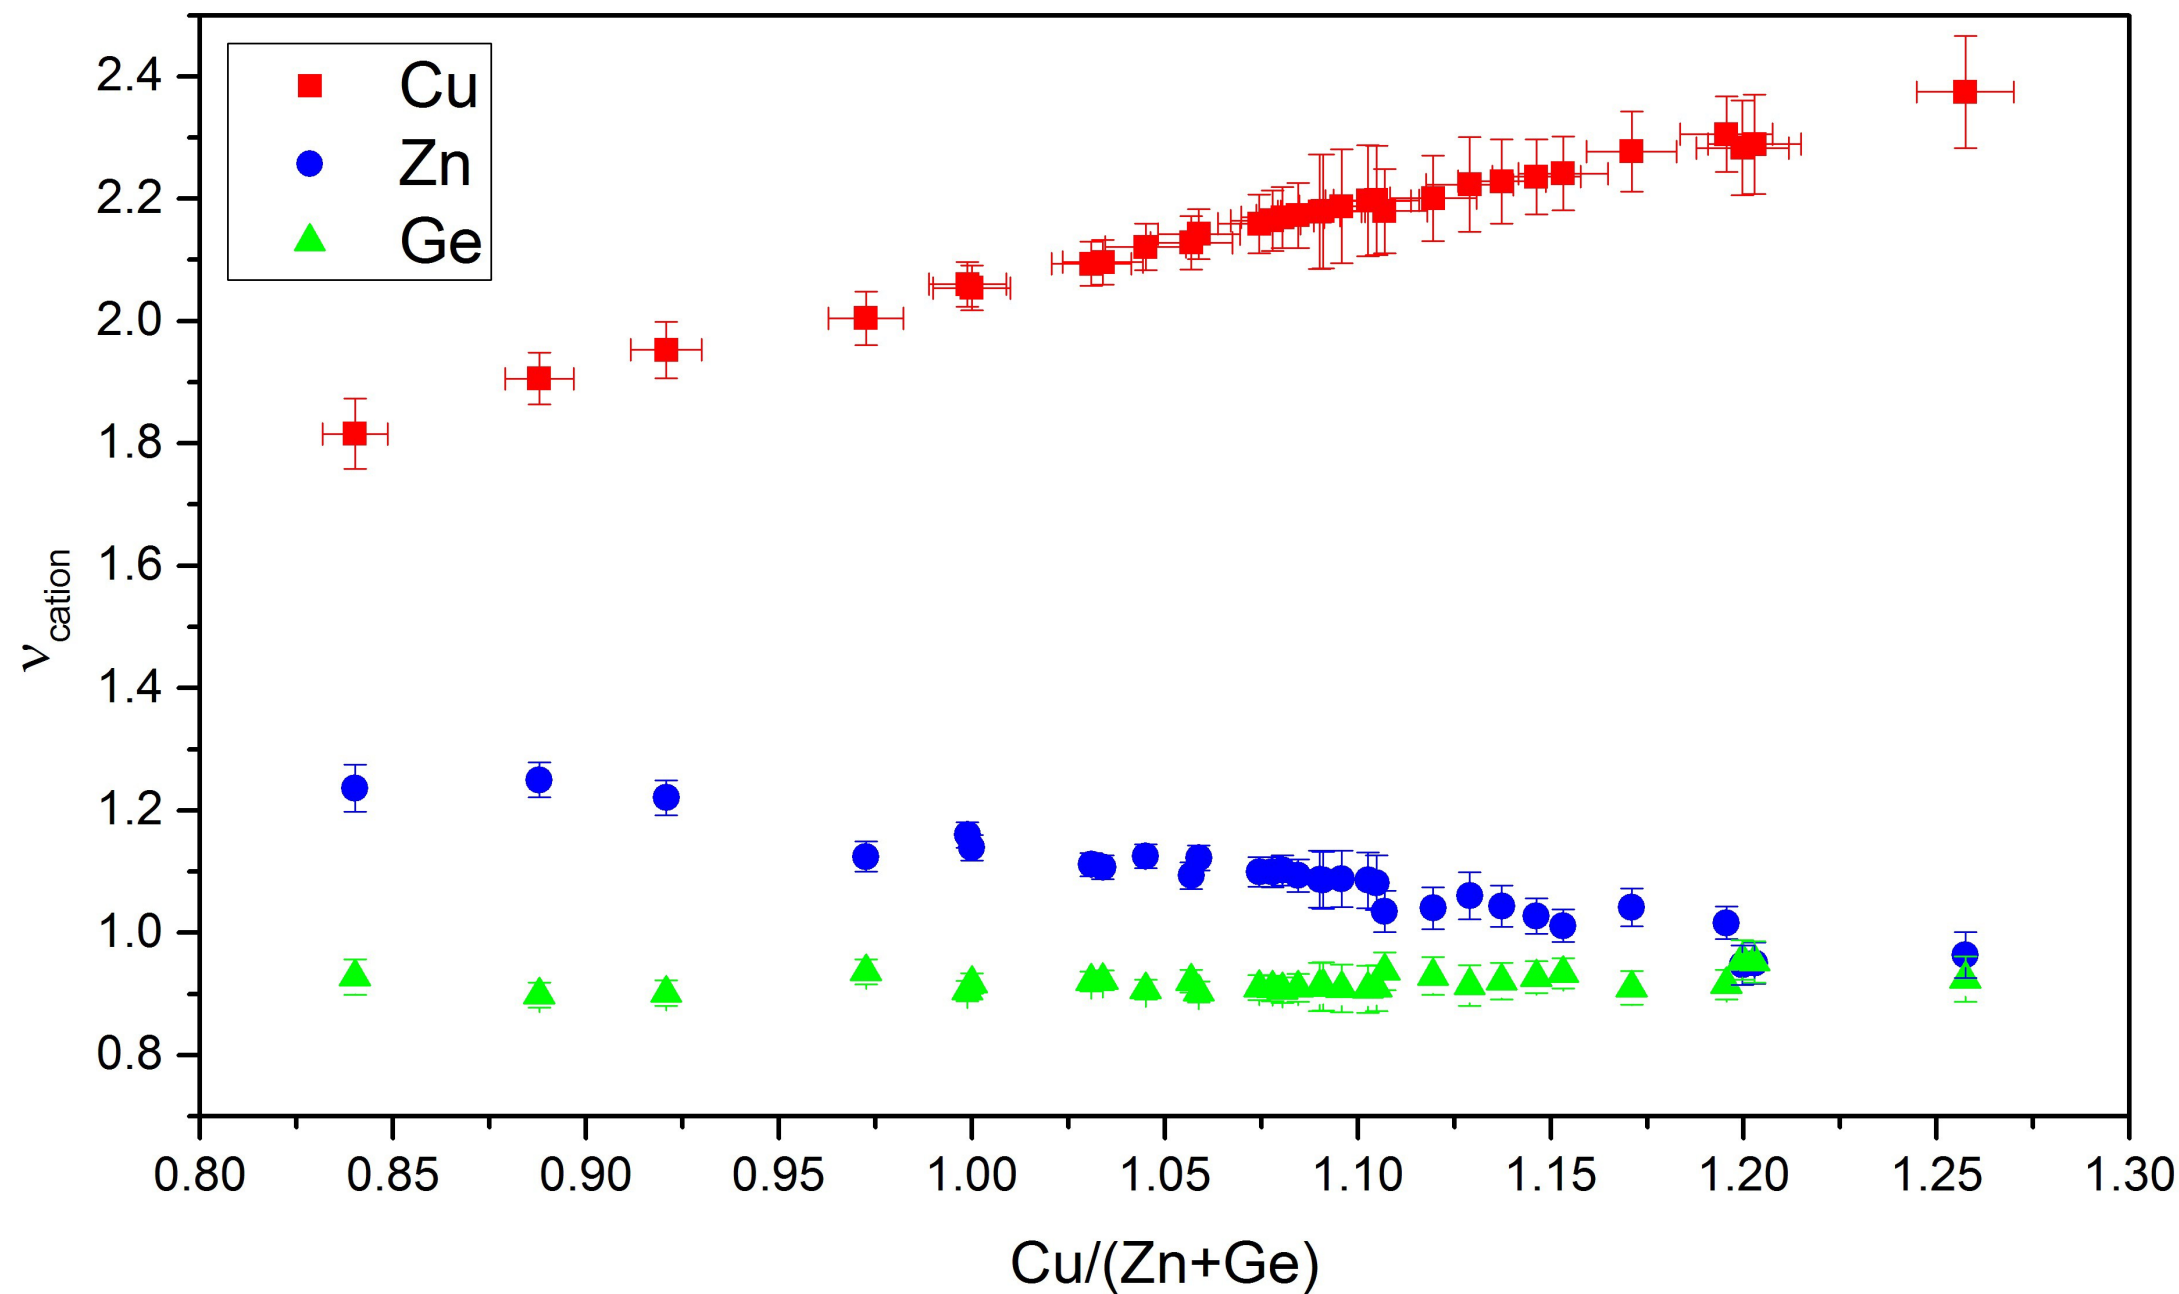

Supplement: c7ce02090b7.pdf [file c7ce02090b7.pdf]

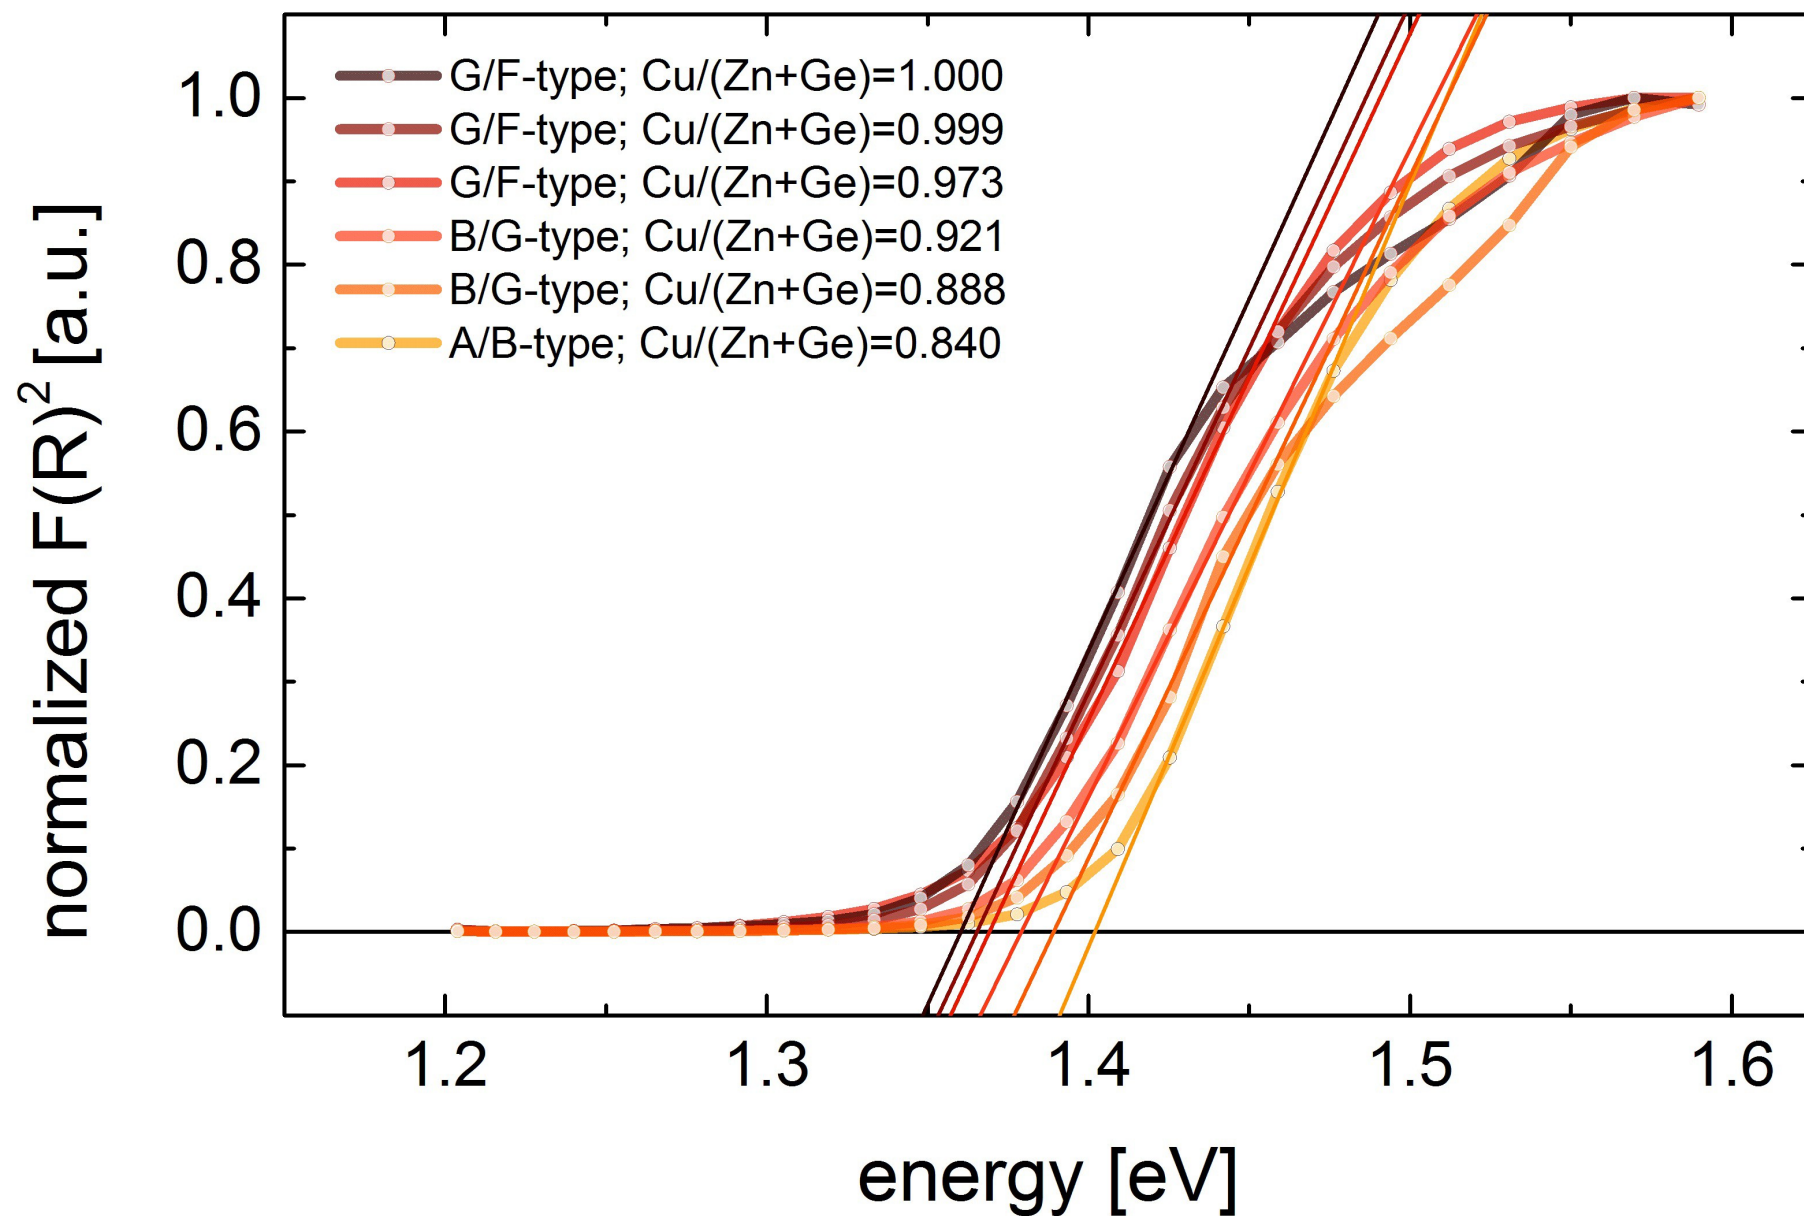

Supplement: c7ce02090b8.pdf [file c7ce02090b8.pdf]
